# Supplementary material for: Deformation twinning of ferrocene crystals assisted by the rotational mobility of cyclopentadienyl rings
Source: Royal Society of Chemistry journal article supplement (doi:10.1039/c4dt03922j), 2015-01-01
Supplement: c4dt03922j1.pdf [file c4dt03922j1.pdf]

## Supporting Information

### **Deformation twinning of ferrocene crystals assisted by the rotational mobility of cyclopentadienyl rings**

Y. Miyamoto and S. Takamizawa\*

Graduate School of Nanobioscience; Yokohama City University; 22-2 Seto: Kanazawa-ku,  
Yokohama 236-0027: Japan

\*E-mail: [staka@yokohama-cu.ac.jp](mailto:staka@yokohama-cu.ac.jp)

Table of Contents for this PDF file:

|                                             |       |
|---------------------------------------------|-------|
| Single-crystal X-ray diffraction experiment | S2–S5 |
| Uniaxial compression test                   | S6–S7 |
| Visible and ultraviolet spectrum            | S8    |

## Single-crystal X-ray diffraction experiment

**Table S1.** Crystallographic data.

|                                              |                                    |                                    |                                    |
|----------------------------------------------|------------------------------------|------------------------------------|------------------------------------|
| Compound                                     | ferrocene                          | nickelocene                        | ruthenocene                        |
| Condition                                    | single crystal                     | single crystal                     | single crystal                     |
| T /K                                         | 298                                | 297                                | 292                                |
| Empirical formula                            | C <sub>10</sub> H <sub>10</sub> Fe | C <sub>10</sub> H <sub>10</sub> Ni | C <sub>10</sub> H <sub>10</sub> Ru |
| Crystal size /mm <sup>3</sup>                | 0.39x0.34x0.29                     | 0.50x0.40x0.31                     | 0.40x0.32x0.31                     |
| M                                            | 186.03                             | 188.89                             | 231.25                             |
| Crystal system                               | Monoclinic                         | Monoclinic                         | Orthorhombic                       |
| Space group                                  | P2(1)/n                            | P2(1)/n                            | Pnma                               |
| a /Å                                         | 5.9252(13)                         | 5.9142(9)                          | 7.1076(12)                         |
| b /Å                                         | 7.6035(16)                         | 7.8676(11)                         | 8.9737(16)                         |
| c /Å                                         | 9.0354(19)                         | 9.1622(13)                         | 12.782(2)                          |
| $\alpha$ /°                                  | 90                                 | 90                                 | 90                                 |
| $\beta$ /°                                   | 93.165(5)                          | 91.895(3)                          | 90                                 |
| $\gamma$ /°                                  | 90                                 | 90                                 | 90                                 |
| V /Å <sup>3</sup>                            | 406.44(15)                         | 426.09(11)                         | 815.2(2)                           |
| Z                                            | 2                                  | 2                                  | 4                                  |
| D <sub>calc</sub> /Mg m <sup>-3</sup>        | 1.520                              | 1.472                              | 1.884                              |
| $\mu$ (Mo K $\alpha$ )/mm <sup>-1</sup>      | 1.777                              | 2.202                              | 1.845                              |
| Reflections collected                        | 2895                               | 3029                               | 5710                               |
| Independent reflections (R <sub>int</sub> )  | 1003(0.0208)                       | 1053(0.0176)                       | 1075(0.0247)                       |
| Goodness of fit                              | 1.030                              | 1.101                              | 1.165                              |
| R <sub>1</sub> (I > 2 $\sigma$ ) (all data)  | 0.0285(0.0411)                     | 0.0254(0.0299)                     | 0.0190(0.0206)                     |
| wR <sub>2</sub> (I > 2 $\sigma$ ) (all data) | 0.0689(0.0754)                     | 0.0659(0.0692)                     | 0.0452(0.0465)                     |
| Least diff. peak (hole) /eÅ <sup>-3</sup>    | 0.184(-0.384)                      | 0.197(-0.492)                      | 0.265(-0.568)                      |

**Table S2.** Crystallographic data of mechanically twinned crystals

| Compound                                    | ferrocene                          | ferrocene                          | nickelocene                        | nickelocene                        |
|---------------------------------------------|------------------------------------|------------------------------------|------------------------------------|------------------------------------|
| Condition                                   | twin_mother                        | twin_daughter                      | twin_mother                        | twin_daughter                      |
| T /K                                        | 298                                | 298                                | 298                                | 298                                |
| Empirical formula                           | C <sub>10</sub> H <sub>10</sub> Fe | C <sub>10</sub> H <sub>10</sub> Fe | C <sub>10</sub> H <sub>10</sub> Ni | C <sub>10</sub> H <sub>10</sub> Ni |
| Crystal size /mm <sup>3</sup>               | 0.43x0.34x0.30                     | 0.43x0.34x0.22                     | 0.32x0.30x0.20                     | 0.30x0.22x0.12                     |
| M                                           | 186.03                             | 186.03                             | 188.89                             | 188.89                             |
| Crystal system                              | Monoclinic                         | Monoclinic                         | Monoclinic                         | Monoclinic                         |
| Space group                                 | P2(1)/n                            | P2(1)/n                            | P2(1)/n                            | P2(1)/n                            |
| a /Å                                        | 5.934(2)                           | 5.928(2)                           | 5.913(5)                           | 5.8966(19)                         |
| b /Å                                        | 7.607(3)                           | 7.607(3)                           | 7.866(7)                           | 7.859(2)                           |
| c /Å                                        | 9.038(3)                           | 9.043(4)                           | 9.157(7)                           | 9.135(3)                           |
| α /°                                        | 90                                 | 90                                 | 90                                 | 90                                 |
| β /°                                        | 93.232(7)                          | 93.154(8)                          | 91.835(16)                         | 91.841(6)                          |
| γ /°                                        | 90                                 | 90                                 | 90                                 | 90                                 |
| V /Å <sup>3</sup>                           | 407.3(2)                           | 407.2(3)                           | 425.7(6)                           | 423.1(2)                           |
| Z                                           | 2                                  | 2                                  | 2                                  | 2                                  |
| D <sub>calcd</sub> /Mg m <sup>-3</sup>      | 1.517                              | 1.517                              | 1.474                              | 1.483                              |
| μ(Mo Kα)/mm <sup>-1</sup>                   | 1.773                              | 1.774                              | 2.204                              | 2.218                              |
| Reflections collected                       | 2680                               | 2630                               | 2719                               | 2691                               |
| Independent reflections (R <sub>int</sub> ) | 977 (0.0377)                       | 958 (0.0406)                       | 1047 (0.1972)                      | 996 (0.0398)                       |
| Goodness of fit                             | 1.119                              | 1.132                              | 1.009                              | 1.031                              |
| R <sub>1</sub> (I > 2σ) (all data)          | 0.0557 (0.0671)                    | 0.0668 (0.0810)                    | 0.1168 (0.1494)                    | 0.0491 (0.0621)                    |
| wR <sub>2</sub> (I > 2σ) (all data)         | 0.1795 (0.1858)                    | 0.2245 (0.2340)                    | 0.3008 (0.3235)                    | 0.1175 (0.1323)                    |
| Least diff. peak (hole) /eÅ <sup>-3</sup>   | 0.852 (-0.497)                     | 1.073 (-0.507)                     | 2.513 (-0.940)                     | 0.795 (-0.348)                     |

**Table S3.** Crystallographic data of mixed crystal of ferrocene/ruthenocene.

| Compound                                    | ferrocene/ruthenocene                                                 |
|---------------------------------------------|-----------------------------------------------------------------------|
| Condition                                   | single crystal                                                        |
| T /K                                        | 298                                                                   |
| Empirical formula                           | C <sub>10</sub> H <sub>10</sub> Fe <sub>0.89</sub> Ru <sub>0.11</sub> |
| Crystal size /mm <sup>3</sup>               | 0.20x0.06x0.06                                                        |
| M                                           | 191.01                                                                |
| Crystal system                              | Monoclinic                                                            |
| Space group                                 | P2(1)/n                                                               |
| a /Å                                        | 5.942(4)                                                              |
| b /Å                                        | 7.696(6)                                                              |
| c /Å                                        | 9.122(7)                                                              |
| α /°                                        | 90                                                                    |
| β /°                                        | 92.908(18)°                                                           |
| γ /°                                        | 90                                                                    |
| V /Å <sup>3</sup>                           | 416.6(5)                                                              |
| Z                                           | 2                                                                     |
| D <sub>calcd</sub> /Mgm <sup>-3</sup>       | 1.523                                                                 |
| μ(Mo Kα)/mm <sup>-1</sup>                   | 1.742                                                                 |
| Reflections collected                       | 2923                                                                  |
| Independent reflections (R <sub>int</sub> ) | 1056 (0.0846)                                                         |
| Goodness of fit                             | 0.836                                                                 |
| R <sub>1</sub> (I > 2σ) (all data)          | 0.0533 (0.1498)                                                       |
| wR <sub>2</sub> (I > 2σ) (all data)         | 0.1194 (0.1598)                                                       |
| Leastdiff.peak (hole) /eÅ <sup>-3</sup>     | 0.459 (-0.674)                                                        |

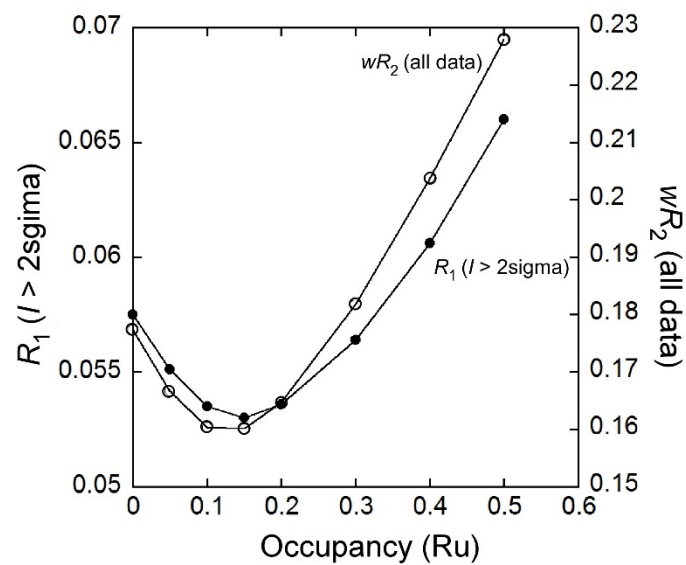

**Figure S1.** Dependence of  $R_1$  and  $wR_2$  on the occupancy of ruthenium in the ruthenium-doped ferrocene crystal. The crystallographical composition was settled on  $(\text{FeCp}_2)_{0.89}(\text{RuCp}_2)_{0.11}$  according to that determined by the visual spectrum shown in Figure S7.

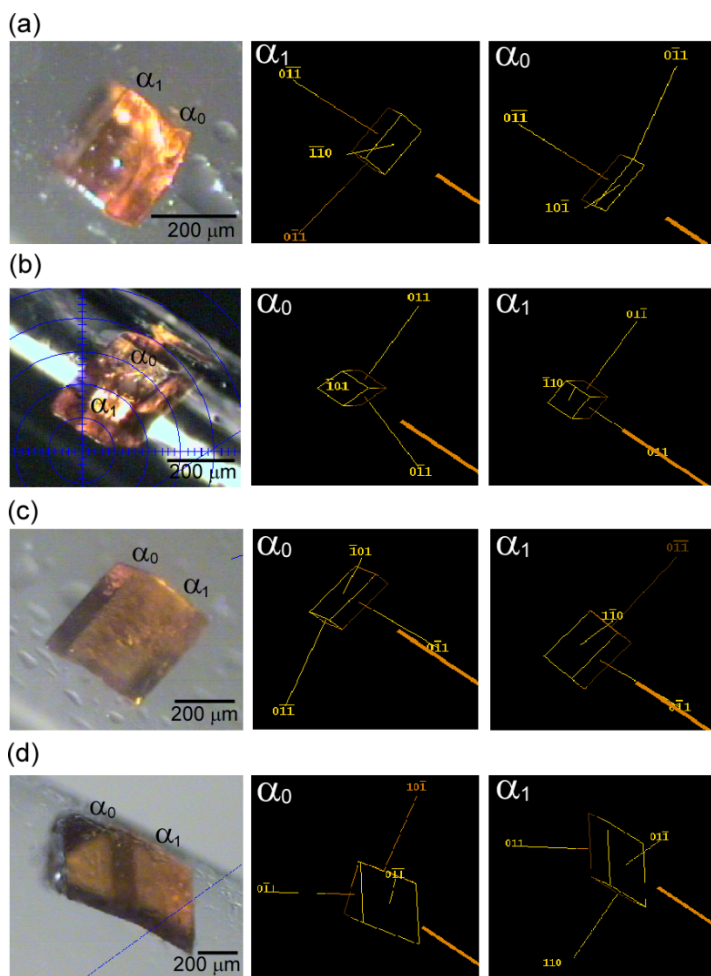

**Figure S2.** Crystal surface indexes of ferrocene. Twinning interfaces are  $(011)\alpha_0//(\bar{0})\alpha_1$  (a),  $(011)\alpha_0//(01)\alpha_1$  (b),  $(01)\alpha_0//(01)\alpha_1$  (c),  $(01)\alpha_0//(011)\alpha_1$  (d). Table 2 was collected from the crystal shown in (d).

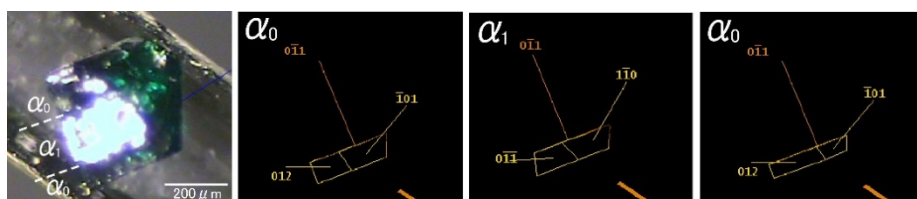

**Figure S3.** Crystal surface indexes of nickelocene. Table 2 was collected from this crystal.

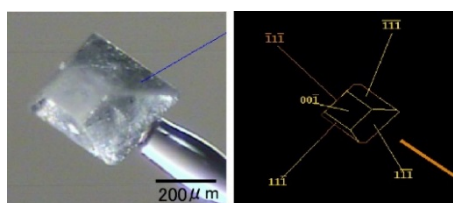

**Figure S4.** Crystal surface indexes of ruthenocene.

## Uniaxial Compression test

|   | Com-<br>pound     | Compression<br>surface | Area/ $\mu\text{m}^2$ | Thickness<br>/ $\mu\text{m}$ | Compression<br>speed/ $\mu\text{m min}^{-1}$ | Top view                                                                                                                                                                                                   | Side view                                                                                                                                                                                                                                   |
|---|-------------------|------------------------|-----------------------|------------------------------|----------------------------------------------|------------------------------------------------------------------------------------------------------------------------------------------------------------------------------------------------------------|---------------------------------------------------------------------------------------------------------------------------------------------------------------------------------------------------------------------------------------------|
| 1 | FeCp <sub>2</sub> | (01)                   | 142955                | 169                          | 84.5                                         | 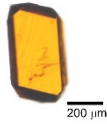 A yellow, rectangular crystal with a dark border. A scale bar of 200 μm is shown at the bottom right.                  |  A yellow, rectangular crystal shown from a side perspective, appearing as a thin, dark-edged plate. A scale bar of 200 μm is shown at the bottom right. |
| 2 | FeCp <sub>2</sub> | (011)or(01)            | 92912                 | 445                          | 44.5                                         |  A yellow, rectangular crystal with a dark border, tilted slightly. A scale bar of 200 μm is shown at the bottom right. |  A yellow, rectangular crystal shown from a side perspective, appearing as a thin, dark-edged plate. A scale bar of 200 μm is shown at the bottom right. |
| 3 | RuCp <sub>2</sub> | (001)                  | 10096                 | 75                           | 37.4                                         |  A dark, rectangular crystal with a white border. A scale bar of 100 μm is shown at the bottom right.                   |  A dark, rectangular crystal shown from a side perspective, appearing as a thin, dark-edged plate. A scale bar of 100 μm is shown at the bottom right.   |

**Table S4.** Conditions of uniaxial compression tests.

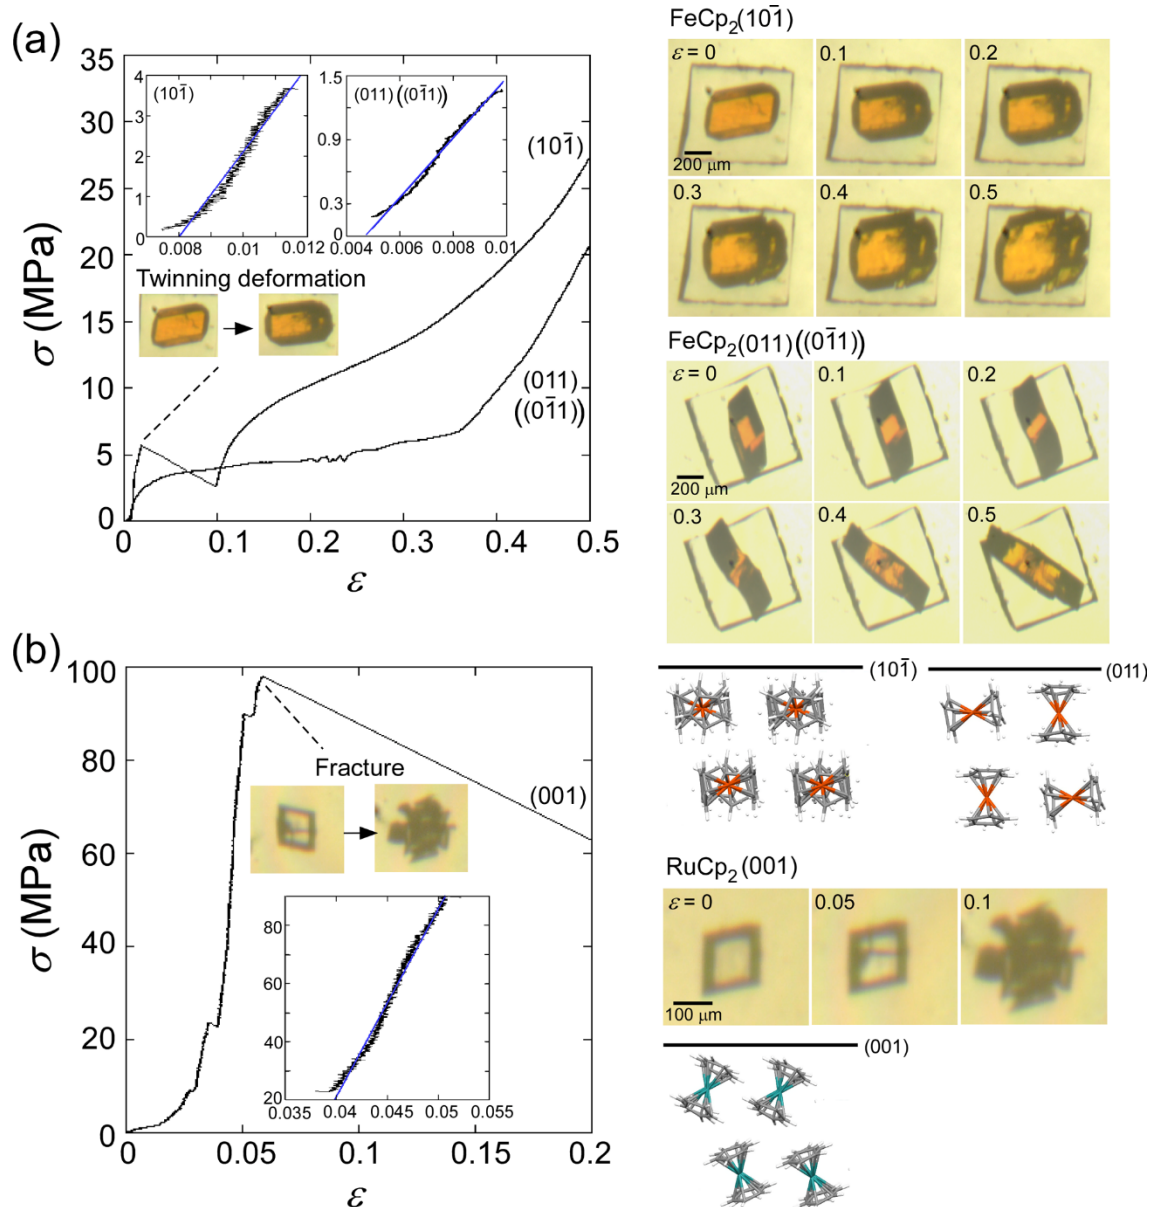

**Figure S5. (Figure 3 in the paper)** Stress-strain curves at 20 °C. (a) Normal direction of FeCp<sub>2</sub> (10) and that of FeCp<sub>2</sub> (011) ((01)). (b) Normal direction of RuCp<sub>2</sub> (001). Test conditions are listed in Table S3. Young's modulus values were 1.1 GPa (FeCp<sub>2</sub> (10)), 0.3 GPa (FeCp<sub>2</sub> (011)), and 6.4 GPa (RuCp<sub>2</sub> (001)), which were estimated from the inset graphs by the least-square method (blue line). Beside the S-S curves, we show photographs of each strain and crystal structure projected perpendicularly in the compression directions.

## Visible and ultraviolet spectrum

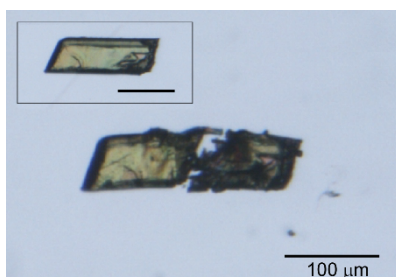

**Figure S6.** Photograph of mixed crystal of ferrocene/ruthenocene ((FeCp<sub>2</sub>)<sub>0.89</sub>(RuCp<sub>2</sub>)<sub>0.11</sub>).

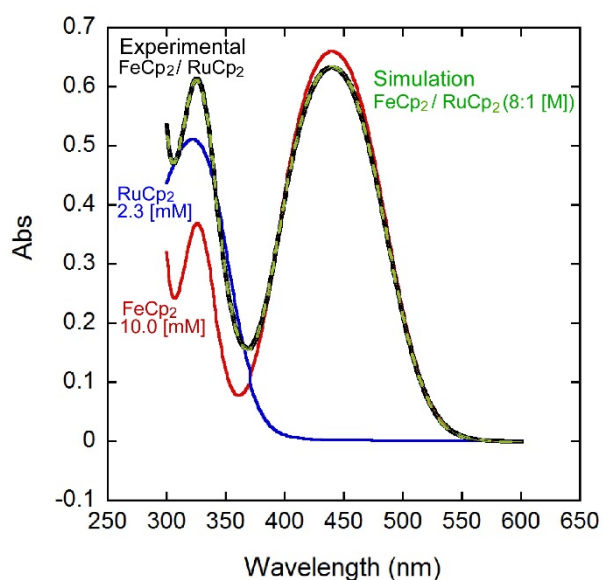

**Figure S7.** UV-VIS spectra for 10.0-mM toluene solution of ferrocene (red), 2.3-mM toluene solution of ruthenocene (blue), and toluene solution of mixed crystals (black). The simulation absorption spectrum (green) in which the molar ratio of ferrocene and ruthenocene is 8.0: 1 (9.6 mM: 1.2 mM) corresponds with the spectrum of the toluene solution containing the dissolved mixed crystals. Thus, the composition of the mixed crystals was calculated to be (FeCp<sub>2</sub>)<sub>0.89</sub>(RuCp<sub>2</sub>)<sub>0.11</sub>.
